# Supplementary material for: Impact of luteinizing hormone suppression on hematopoietic recovery after intensive chemotherapy in patients with leukemia
Source: PubMed Central journal article supplement — Haematologica. 2020 Dec 3;106(4):1097–105. doi: 10.3324/haematol.2020.256453 (PMC8586820; doi:10.3324/haematol.2020.256453), 2020-12-03

## Impact of luteinizing hormone suppression on hematopoietic recovery after intensive chemotherapy in patients with leukemia

Iman Abou Dalle,<sup>1,2</sup> Ronald Paranal,<sup>3</sup> Jabra Zarka,<sup>1</sup> Shilpa Paul,<sup>4</sup> Koji Sasaki,<sup>1</sup> Wen Li,<sup>5</sup> Jing Ning,<sup>6</sup> Nicholas J. Short,<sup>1</sup> Maro Ohanian,<sup>1</sup> Jorge E. Cortes,<sup>7</sup> Elias J. Jabbour<sup>1</sup> and Ghayas C. Issa<sup>1</sup>

<sup>1</sup>Department of Leukemia, The University of Texas MD Anderson Cancer Center, Houston, TX, USA; <sup>2</sup>Division of Hematology and Oncology, American University of Beirut, Beirut, Lebanon; <sup>3</sup>Department of Medicine, Baylor College of Medicine, Houston, TX, USA; <sup>4</sup>Department of Clinical Pharmacy, The University of Texas MD Anderson Cancer Center, Houston, TX, USA; <sup>5</sup>Division of Clinical and Translational Sciences, Department of Internal Medicine, The University of Texas McGovern Medical School at Houston, Houston, TX, USA; <sup>6</sup>Department of Biostatistics, The University of Texas MD Anderson Cancer Center, Houston, TX, USA and <sup>7</sup>Georgia Cancer Center, Augusta University, Augusta, GA, USA

©2021 Ferrata Storti Foundation. This is an open-access paper. doi:10.3324/haematol.2020.256453

Received: April 23, 2020.

Accepted: November 6, 2020.

Pre-published: December 3, 2020.

Correspondence: GHAYAS C. ISSA - [gcissa@mdanderson.org](mailto:gcissa@mdanderson.org)

---

## Supplementary Material

### Impact of Luteinizing Hormone Suppression on Hematopoietic Recovery after Intensive Chemotherapy in Patients with Leukemia

Iman Abou Dalle<sup>1,2</sup>, Ronald Paranal<sup>3</sup>, Jabra Zarka<sup>1</sup>, Shilpa Paul<sup>4</sup>, Koji Sasaki<sup>1</sup>, Wen Li<sup>5</sup>, Jing Ning<sup>6</sup>, Nicholas J. Short<sup>1</sup>, Maro Ohanian<sup>1</sup>, Jorge E. Cortes<sup>7</sup>, Elias J. Jabbour, MD, and Ghayas C. Issa<sup>1</sup>

<sup>1</sup>Department of Leukemia, The University of Texas MD Anderson Cancer Center, Houston, Texas

<sup>2</sup>Division of Hematology and Oncology, American University of Beirut, Beirut, Lebanon

<sup>3</sup>Department of Medicine, Baylor College of Medicine, Houston, Texas

<sup>4</sup>Department of Clinical Pharmacy, The University of Texas MD Anderson Cancer Center, Houston, Texas

<sup>5</sup>Division of Clinical and Translational Sciences, Department of Internal Medicine, the University of Texas McGovern Medical School at Houston, Houston, TX

<sup>6</sup>Department of Biostatistics, The University of Texas MD Anderson Cancer Center, Houston, Texas

<sup>7</sup>Georgia Cancer Center, Augusta University, Augusta, GA

**Table 1S:** Mutational profile of matched AML cohorts.

|                    | <b>Leuprolide</b> | <b>Control</b> | <b>P</b> |
|--------------------|-------------------|----------------|----------|
| <i>FLT3</i>        | 16/62 (26%)       | 25/99 (25%)    | 1        |
| <i>NPM1</i>        | 15/47 (32%)       | 13/73 (18%)    | 0.8      |
| <i>IDH1/2</i>      | 6/38 (16%)        | 13/47 (28%)    | 0.3      |
| <i>RAS</i>         | 13/65 (20%)       | 18/85 (21%)    | 1        |
| <i>PTPN11</i>      | 2/30 (7%)         | 2/30 (7%)      | 1        |
| <i>TP53</i>        | 0/31 (0%)         | 4/34 (12%)     | 0.1      |
| <i>JAK2</i>        | 2/32 (6%)         | 5/161 (3%)     | 0.3      |
| Mutated/tested (%) |                   |                |          |

**Table 2S:** Leuprolide dosing characteristics for propensity matched cohorts.

|                                                                                  | <b>AML (N = 64)</b> | <b>ALL (N =49)</b> |
|----------------------------------------------------------------------------------|---------------------|--------------------|
| N (%) of patient with leuprolide given between day -7 and day 15 of chemotherapy | 33 (52)             | 22 (45)            |
| N (%) of patient with leuprolide given between day -7 and day 0 of chemotherapy  | 16 (25)             | 10 (20)            |
| Median cumulative leuprolide dose (range), mg                                    | 22.5 (3 – 78.75)    | 22.5 (11.25 – 135) |
| N (%) of patient by single leuprolide dosing                                     |                     |                    |
| 1 mg                                                                             | 1 (2)               | 0 (0)              |
| 3.75 mg                                                                          | 3 (5)               | 2 (4)              |
| 7.5 mg                                                                           | 1 (2)               | 0 (0)              |
| 11.25 mg                                                                         | 57 (89)             | 42 (86)            |
| 22.5 mg                                                                          | 8 (13)              | 11 (22)            |
| 30 mg                                                                            | 1 (2)               | 0 (0)              |

Leuprolide is given as leuprolide acetate 1 mg daily, or depot at 3.75 mg monthly, 7.5 mg monthly, 11.25 mg every 3 months, 22.5 mg every 3 months, 30 mg every 4 months. Some patient received different dosing each injection.

**Table 3S: Univariate analysis for factors predicting count recovery with leuprolide.**

|                            | ANC                                 |              | ALC                                 |              | Platelets                           |                  | Hemoglobin                            |                  |
|----------------------------|-------------------------------------|--------------|-------------------------------------|--------------|-------------------------------------|------------------|---------------------------------------|------------------|
|                            | 10 <sup>6</sup> /L/year<br>(95% CI) | P            | 10 <sup>6</sup> /L/year<br>(95% CI) | P            | 10 <sup>6</sup> /L/year<br>(95% CI) | P                | 10 <sup>3</sup> g/dL/year<br>(95% CI) | P                |
| <b>AML</b>                 |                                     |              |                                     |              |                                     |                  |                                       |                  |
| Age                        | 0.3<br>(-1.4, 2.1)                  | 0.7          | -0.3<br>(-1.2, 0.6)                 | 0.5          | 6.8<br>(-86.7, 100.4)               | 0.8              | 0.3<br>(-0.7, 1.2)                    | 0.6              |
| PS ≤1                      | -53.7<br>(-118.6, 11.3)             | 0.1          | 61.6<br>(21.3, 101.8)               | <b>0.003</b> | 5028.9<br>(3903.2, 6154.6)          | <b>&lt;0.001</b> | 31.2<br>(-26.5, 88.9)                 | 0.2              |
| Adverse Risk               | 22.9<br>(-57.5, 103.4)              | 0.5          | -20.1<br>(-44.4, 4.2)               | 0.1          | -4013.9<br>(-7289.2, -738.6)        | <b>0.02</b>      | -4.4<br>(-37.3, 28.5)                 | 0.79             |
| AMML/AMOL                  | 31.5<br>(-0.7, 63.7)                | 0.06         | -18.4<br>(-41.6, 4.8)               | 0.12         | 604.3<br>(-857.6, 2066.2)           | 0.42             | 13.2<br>(-4.4, 30.8)                  | 0.14             |
| BM blast %                 | 0.3<br>(-0.6, 1.3)                  | 0.51         | 0.4<br>(-0.3, 1)                    | 0.27         | 10.6<br>(-32, 53.3)                 | 0.63             | 0.5<br>(0.3, 0.7)                     | <b>&lt;0.001</b> |
| Targeted therapy           | -23.3<br>(-52.8, 6.3)               | 0.12         | 1.2<br>(-17.4, 19.9)                | 0.89         | -2033.8<br>(-3101.4, -966.1)        | <b>&lt;0.001</b> | -16.3<br>(-37.7, 5.2)                 | 0.27             |
| Leuprolide (D -7 - D15)    | -30.3<br>(-100.5, 39.8)             | 0.4          | -0.3<br>(-19.1, 18.5)               | 0.98         | -541<br>(-3338.5, 2256.4)           | 0.7              | 12.2<br>(-17.9, 42.4)                 | 0.43             |
| Cumulative leuprolide dose | 0.5<br>(-1.2, 2.1)                  | 0.58         | 0<br>(-0.9, 0.9)                    | 0.96         | -5<br>(-82.1, 72.2)                 | 0.9              | 0.3<br>(-0.5, 1.1)                    | 0.45             |
| Relapse                    | 14.7<br>(-34.6, 64)                 | 0.56         | -25.7<br>(-49.7, -1.7)              | <b>0.04</b>  | 628.9<br>(-1734.3, 2992.2)          | 0.6              | -25.6<br>(-45.8, -5.4)                | <b>0.01</b>      |
| Transplant                 | 1.2<br>(-52.9, 55.3)                | 0.97         | 33.4<br>(-7.7, 74.5)                | 0.11         | 1887.8<br>(-1605.5, 5381.1)         | 0.29             | 21.6<br>(-0.5, 43.7)                  | 0.05             |
| Triplet therapy            | -28.6<br>(-62.3, 5.2)               | 0.1          | 31.8<br>(10.8, 52.7)                | <b>0.003</b> | -235.7<br>(-1962.3, 1489.9)         | 0.79             | 20.9<br>(2.8, 39.1)                   | <b>0.02</b>      |
| <b>ALL</b>                 |                                     |              |                                     |              |                                     |                  |                                       |                  |
| Age                        | -1.5<br>(-4.1, 1.2)                 | 0.27         | 0.6<br>(-0.1, 1.4)                  | 0.1          | 15.2<br>(-111.5, 141.8)             | 0.81             | 0.7<br>(-0.6, 1.9)                    | 0.29             |
| PS ≤1                      | -92.6<br>(-202.4, 17.2)             | 0.1          | 58.7<br>(15.7, 101.7)               | <b>0.008</b> | 2211.8<br>(-2187.9, 6611.5)         | 0.32             | -20.5<br>(-155.1, 114.1)              | 0.77             |
| Adverse Risk               | -13.5<br>(-55.2, 28.1)              | 0.52         | 6.6<br>(-9.7, 22.9)                 | 0.43         | 1485.4<br>(-130.5, 3101.3)          | 0.07             | 17.3<br>(1, 33.6)                     | <b>0.04</b>      |
| B vs T ALL                 | 26.5<br>(-19, 72)                   | 0.25         | -28.8<br>(-49, -8.7)                | <b>0.005</b> | -224.4<br>(-1713, 1264.3)           | 0.77             | 14.7<br>(-5, 34.4)                    | 0.14             |
| BM blasts %                | 0.2<br>(-0.8, 1.3)                  | 0.65         | -0.4<br>(-1, 0.2)                   | 0.16         | -13.8<br>(-58.1, 30.5)              | 0.54             | -0.2<br>(-0.7, 0.3)                   | 0.51             |
| Leuprolide (D -7 - D15)    | -8.1<br>(-48.7, 32.4)               | 0.7          | 2.5<br>(-13.3, 18.3)                | 0.76         | 90.7<br>(-1784.2, 1965.5)           | 0.92             | 4.1<br>(-10.8, 19)                    | 0.59             |
| Cumulative leuprolide dose | -0.2<br>(-0.7, 0.3)                 | 0.38         | 0<br>(-0.3, 0.2)                    | 0.88         | -11.5<br>(-46.4, 23.4)              | 0.52             | -0.1<br>(-0.5, 0.2)                   | 0.4              |
| Relapse                    | 70<br>(28.4, 111.7)                 | <b>0.001</b> | -10.9<br>(-30.1, 8.4)               | 0.27         | 340.4<br>(-1232, 1912.1)            | 0.67             | -13<br>(-29.6, 3.6)                   | 0.12             |
| HyperCVAD                  | -48.5<br>(-83.8, -13.2)             | <b>0.006</b> | 14.5 (1.9, 27.1)                    | <b>0.02</b>  | 1179.2<br>(-755, 3113.5)            | 0.23             | 2.6<br>(-19.9, 25.2)                  | 0.8              |
| Transplant                 | 44.4<br>(9.8, 78.9)                 | <b>0.01</b>  | -0.4<br>(-15.6, 14.8)               | 0.96         | -798.7<br>(-2657.5, 1060)           | 0.4              | -3.9<br>(-20.5, 12.8)                 | 0.65             |

Values shown represent effect of variable on change in count per year (95% confidence interval).

ANC: absolute neutrophil count; ALC: absolute lymphocyte count; PS: Eastern Cooperative Oncology Group performance status, assessed as PS ≤1 vs PS ≥2; Adverse risk in AML according to the European LeukemiaNet risk stratification, adverse risk in ALL corresponds to complex karyotype (≥ 5 abnormalities) t(9;22), t(4;11), and low hypodiploidy/near-triploidy, assessed as adverse vs non-adverse; BM blasts: bone marrow blasts, assessed a continuous variable; Triplet chemotherapy: idarubicin and cytarabine plus a nucleoside analog (ie. cladribine, clofarabine, or fludarabine), compared to doublet chemotherapy. Transplant corresponds to an allogeneic hematopoietic stem cell transplant; HyperCVAD: hyperfractionated cyclophosphamide, vincristine, Adriamycin, dexamethasone, compared to all other treatments. Relapse and transplant were assessed as time-dependent variables.

**Figure 1S: Time to platelet and neutrophil count recovery following induction chemotherapy with and without leuprolide.** Time in days from the start of induction chemotherapy to platelet and neutrophil count recovery defined as achievement of platelet count above  $100 \times 10^9/L$  and absolute neutrophil count above  $1 \times 10^9/L$  in AML (A-C) and ALL (B-D).

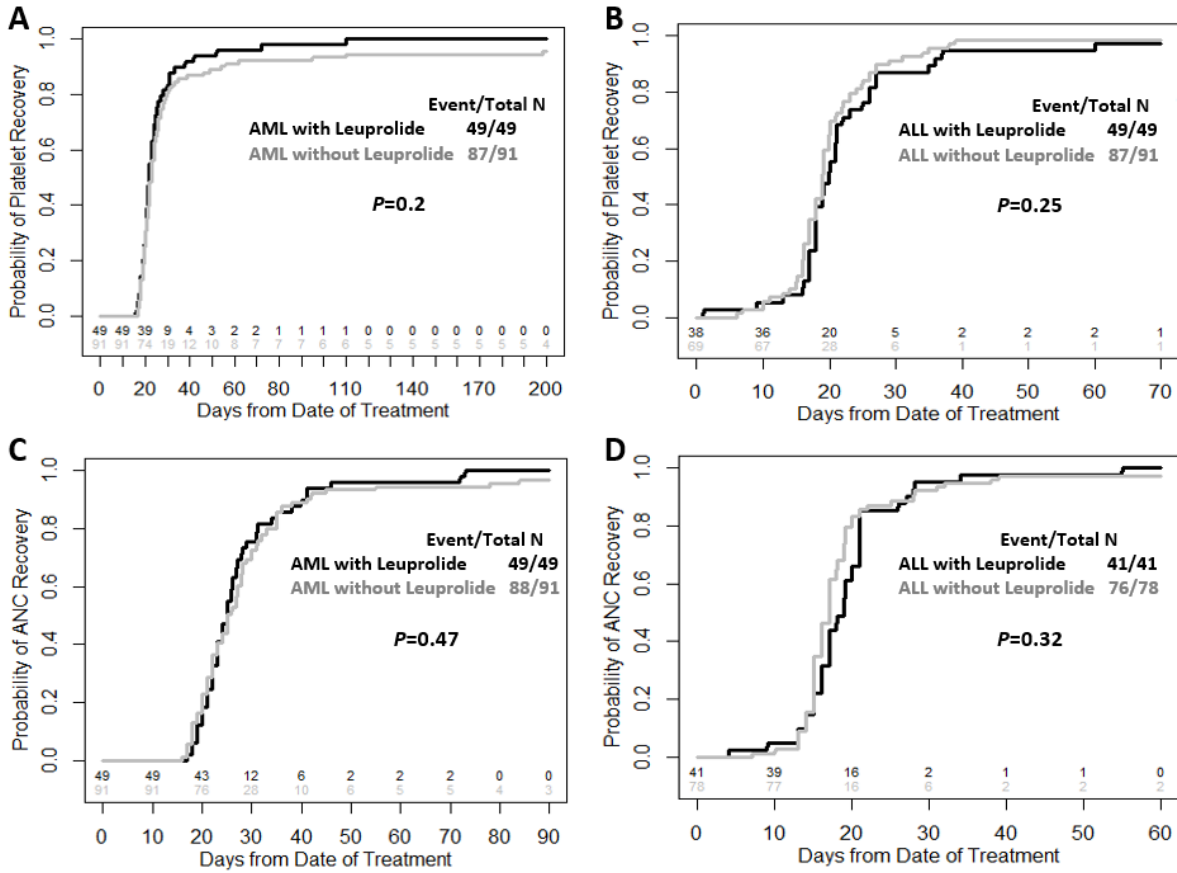

**Figure 2S: Long-term changes in hematocrit and red blood cell levels with and without leuprolide.** Scatterplots of all corresponding peripheral blood hematocrit (HCT) and red blood cell (RBC) levels extracted from health records, collected between induction chemotherapy (Day 0) and last follow-up date where each dot represents a single value (blue for leuprolide, red for control). Lowess smooth curves were used for indicating longitudinal trajectories of counts and differences were assessed using the generalized estimation equation model.

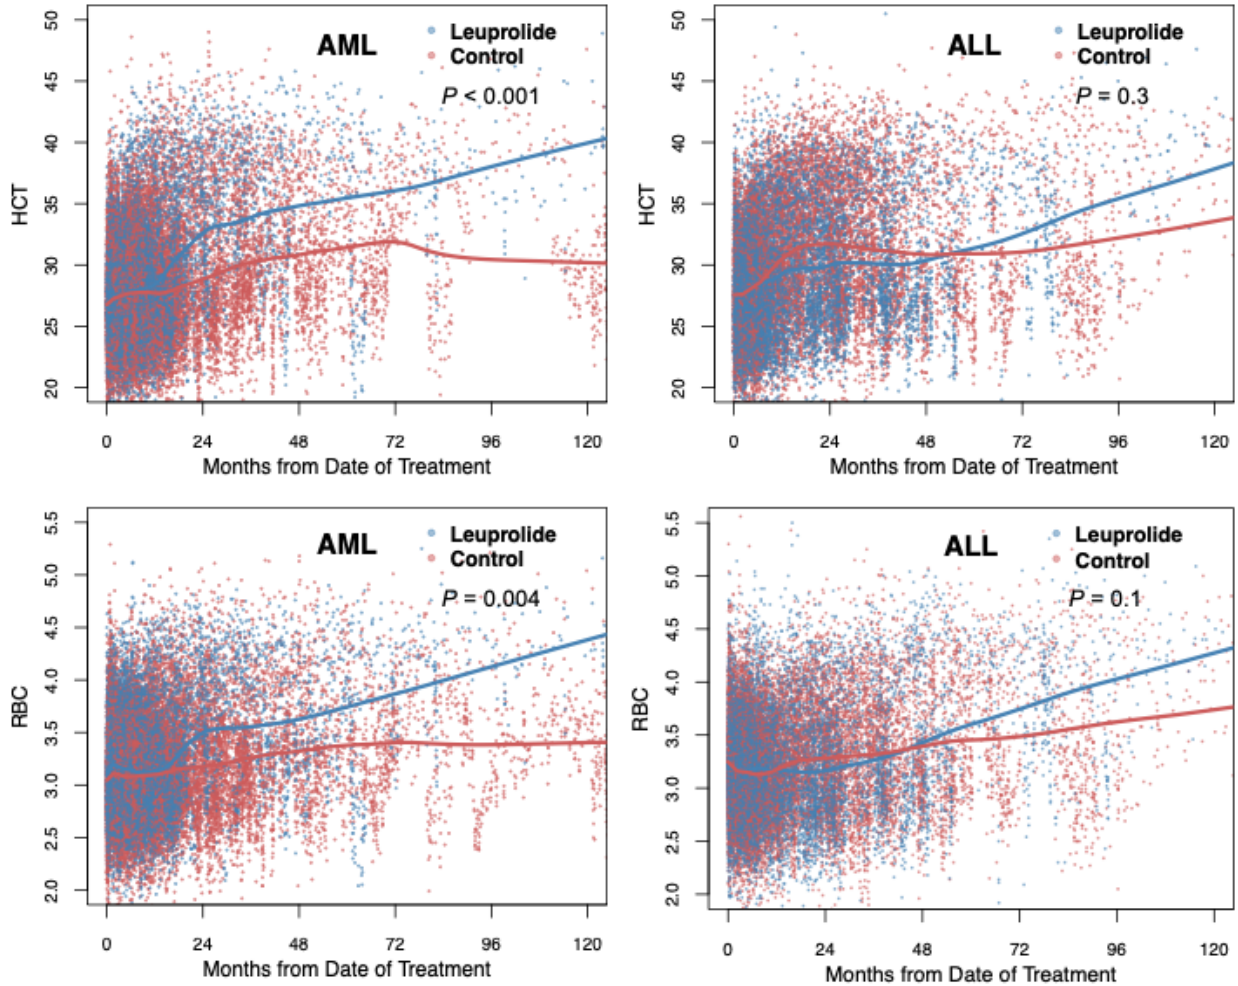

Figure 3S. Event-free survival in AML and ALL cohorts before and after propensity score matching.

**Before propensity score matching**

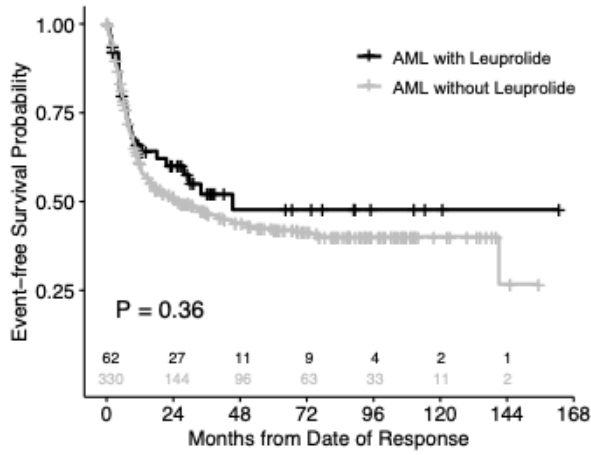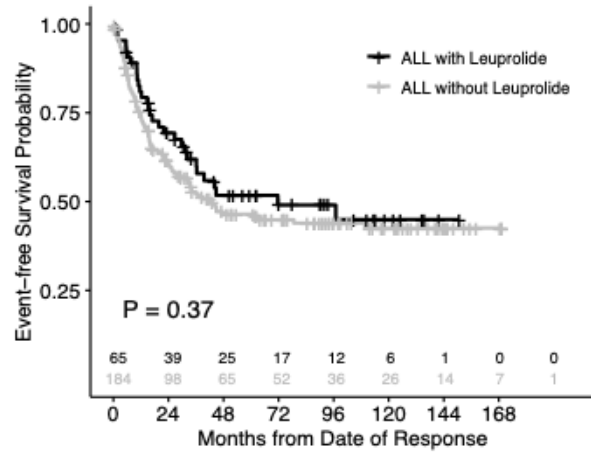

**After propensity score matching**

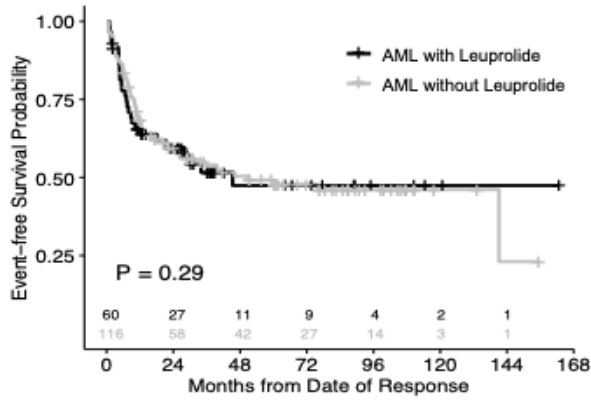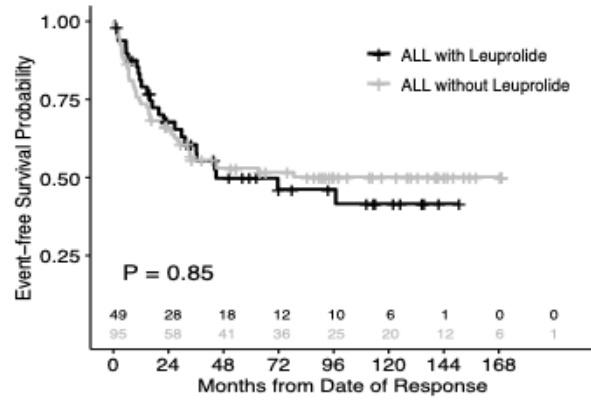

**Figure 4S: Event-free survival and overall survival in AML and ALL cohorts after propensity score matching censored for allogeneic stem cell transplantation.**

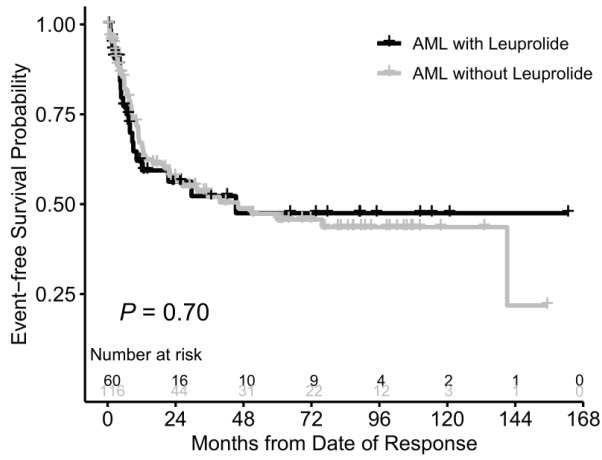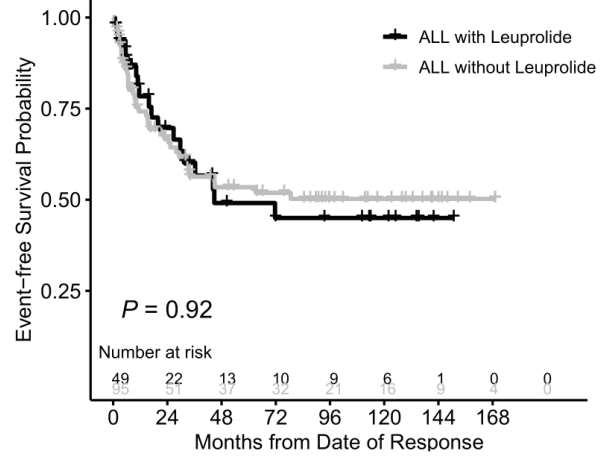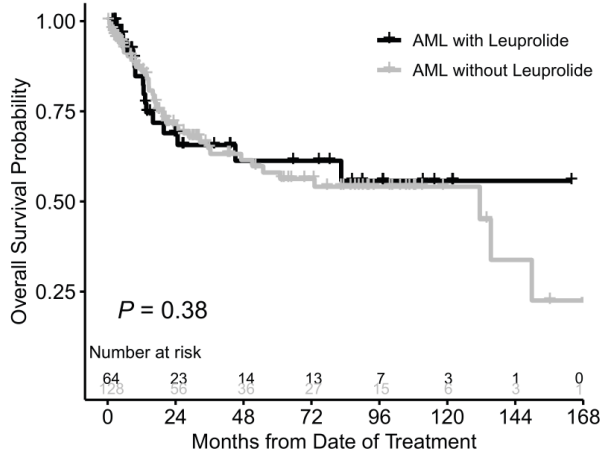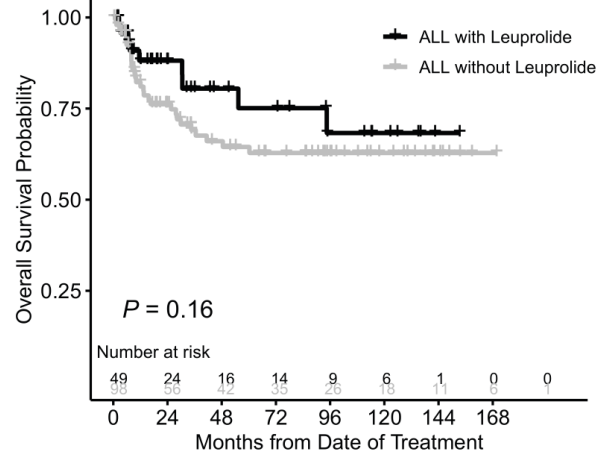

Supplement: 2020_256453_DALLE_SUPPL.pdf [file 2020_256453_DALLE_SUPPL.pdf]
